# Supplementary material
Source: publisher site journal article supplement (https://www.spandidos-publications.com/3466/downloadSupplementary)

Figure S1. miR-NC and miR-19a-5p mimics were transfected into (A) ES-2 and (B) SKOV-3 cells and the expression of miR-19a-5p was detected by reverse transcription quantitative PCR. \*\*\* $P < 0.001$ . miR, microRNA; NC, negative control.

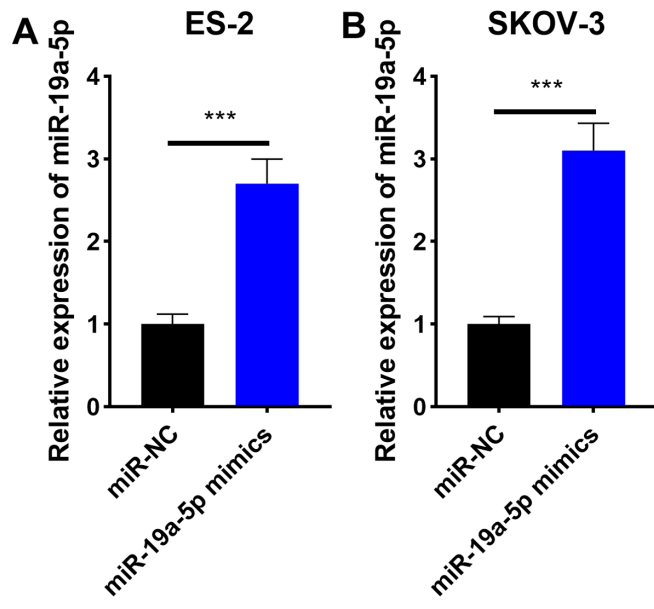

Figure S2. in-NC and miR-19a-5p inhibitors were transfected into SKOV-3 cells and the expression of miR-19a-5p was detected by reverse transcription quantitative PCR. \*\*\*P<0.001. miR, microRNA; NC, negative control; in, inhibitor.

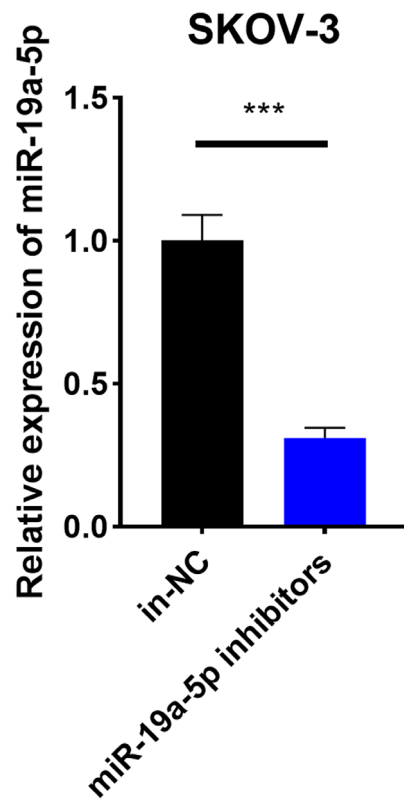

Supplement: Supplementary file [file downloadSupplementary]
